# Supplementary material
Source: publisher figshare collection journal article supplement (https://tandf.figshare.com/articles/dataset/_/5743326)
Supplement: Supplementary file 2 [file 1]

**Supplemental Table T3. Illumina 16S rRNA sequence data for environmental samples, showing the relative contribution (in %) of all taxa identified.**

| Domain     | Phylum                   | Subgroup                   | Bubbling Pool<br>Sediment | Surface biofilm | Pool Sediment |
|------------|--------------------------|----------------------------|---------------------------|-----------------|---------------|
| Archaea    |                          |                            |                           |                 |               |
|            | <i>Crenarchaeota</i>     |                            | 8.19                      | 6.31            | 0.11          |
|            | <i>Euryarchaeota</i>     |                            | 0.13                      | 1.08            | 0.00          |
|            | <i>Ca. Parvarchaeota</i> |                            | 0.00                      | 0.02            | 0.00          |
| Bacteria   |                          |                            |                           |                 |               |
|            | AD3                      |                            | 0.93                      | 0.52            | 0.00          |
|            | <i>Acidobacteria</i>     |                            | 16.97                     | 18.81           | 9.47          |
|            | <i>Actinobacteria</i>    |                            | 1.90                      | 2.24            | 3.97          |
|            | <i>Armatimonadetes</i>   |                            | 0.21                      | 0.06            | 0.02          |
|            | BHI80-139                |                            | 0.02                      | 0.00            | 0.00          |
|            | <i>Bacteroidetes</i>     |                            | 0.26                      | 0.10            | 4.90          |
|            | <i>Chlamydiae</i>        |                            | 0.28                      | 0.75            | 0.01          |
|            | <i>Chlorobi</i>          |                            | 0.00                      | 0.00            | 0.01          |
|            | <i>Chloroflexi</i>       |                            | 21.94                     | 7.01            | 0.11          |
|            | <i>Cyanobacteria</i>     |                            | 0.16                      | 0.69            | 0.10          |
|            | <i>Elusimicrobia</i>     |                            | 0.43                      | 1.09            | 0.11          |
|            | FCPU426                  |                            | 0.06                      | 0.02            | 0.00          |
|            | <i>Firmicutes</i>        |                            | 1.15                      | 1.89            | 1.79          |
|            | <i>Fusobacteria</i>      |                            | 0.04                      | 0.00            | 0.00          |
|            | GAL15                    |                            | 0.10                      | 2.70            | 0.01          |
|            | <i>Gemmatimonadetes</i>  |                            | 0.02                      | 0.57            | 3.29          |
|            | <i>Nitrospirae</i>       |                            | 3.95                      | 1.54            | 0.04          |
|            | OD1                      |                            | 0.01                      | 0.01            | 0.01          |
|            | OP3                      |                            | 0.00                      | 0.05            | 0.00          |
|            | <i>Planctomycetes</i>    |                            | 6.85                      | 6.77            | 1.55          |
|            | <i>Proteobacteria</i>    |                            |                           |                 |               |
|            |                          | <i>Alphaproteobacteria</i> | 15.34                     | 26.88           | 12.66         |
|            |                          | <i>Betaproteobacteria</i>  | 5.70                      | 4.36            | 12.43         |
|            |                          | <i>Deltaproteobacteria</i> | 1.73                      | 9.33            | 4.24          |
|            |                          | <i>Gammaproteobacteria</i> | 9.08                      | 2.74            | 43.53         |
|            | <i>Spirochaetes</i>      |                            | 0.00                      | 0.24            | 0.16          |
|            | TM6                      |                            | 0.01                      | 0.33            | 0.02          |
|            | <i>Verrucomicrobia</i>   |                            | 0.06                      | 0.15            | 0.41          |
|            | WPS-2                    |                            | 1.87                      | 1.97            | 0.19          |
|            | ZB3                      |                            | 0.00                      | 0.01            | 0.00          |
|            | <i>Ca. Thermi</i>        |                            | 0.00                      | 0.01            | 0.00          |
| Unassigned |                          |                            | 2.59                      | 1.75            | 0.86          |
