# Supplementary material
Source: publisher figshare collection journal article supplement (https://tandf.figshare.com/articles/dataset/_/5743326)
Supplement: Supplementary file 3 [file 1]

**Supplemental Table T2.** Illumina 16S rRNA sequence data for the cultures showing the relative contribution (in %) of all taxa identified. Only taxa representing at least 0.1% of the Illumina sequence data are shown.

| Phylum         | Class               | Order              | C4HH        | C6HC        | T4OC        | T4HH        | T4HC        | T6OC        | T6HM        | T6HC        | V4OC        | V4HH        | V4HC        | V6OM        | V6OC        | V6HC        |
|----------------|---------------------|--------------------|-------------|-------------|-------------|-------------|-------------|-------------|-------------|-------------|-------------|-------------|-------------|-------------|-------------|-------------|
| Acidobacteria  |                     |                    |             |             |             |             |             |             |             |             |             |             |             |             |             |             |
|                | Acidobacteria       |                    |             |             |             |             |             |             |             |             |             |             |             |             |             |             |
|                |                     | Acidobacteriales   | 0.1         | 0.0         | 0.0         | 0.5         | 0.2         | 0.0         | 0.3         | 0.1         | 0.1         | 0.0         | 0.0         | 0.0         | 0.0         | 0.0         |
| Actinobacteria |                     |                    |             |             |             |             |             |             |             |             |             |             |             |             |             |             |
|                | Actinobacteria      |                    |             |             |             |             |             |             |             |             |             |             |             |             |             |             |
|                |                     | Actinomycetales    | <b>4.7</b>  | 0.5         | 0.0         | 1.6         | 0.0         | 0.3         | 0.5         | 0.2         | 3.6         | <b>14.0</b> | 3.8         | 0.3         | <b>15.5</b> | 3.1         |
|                |                     | OPB41              | 0.0         | 0.0         | 0.0         | 0.0         | 0.0         | 0.9         | 0.0         | 0.1         | 0.0         | 0.0         | 0.0         | 0.0         | 0.0         | 0.0         |
| Bacteroidetes  |                     |                    |             |             |             |             |             |             |             |             |             |             |             |             |             |             |
|                | Bacteroidia         |                    |             |             |             |             |             |             |             |             |             |             |             |             |             |             |
|                |                     | Bacteroidales      | 0.0         | 0.0         | 0.0         | 0.0         | 0.0         | 0.0         | 0.0         | 0.0         | 0.0         | 0.0         | 0.0         | 2.0         | 0.0         | 0.1         |
|                | [Saprospirae]       |                    |             |             |             |             |             |             |             |             |             |             |             |             |             |             |
|                |                     | [Saprospirales]    | 0.0         | 0.0         | 0.0         | 0.0         | 0.0         | 0.0         | 0.1         | 0.0         | 0.0         | 0.0         | 0.0         | 0.0         | 0.0         | 0.0         |
| Firmicutes     |                     |                    |             |             |             |             |             |             |             |             |             |             |             |             |             |             |
|                | Bacilli             |                    |             |             |             |             |             |             |             |             |             |             |             |             |             |             |
|                |                     | Bacillales         | <b>62.9</b> | 4.7         | 0.4         | 6.8         | 0.4         | 8.7         | 2.3         | 0.3         | 10.2        | <b>51.4</b> | <b>35.3</b> | 1.0         | 6.2         | <b>15.0</b> |
|                |                     | Lactobacillales    | 0.2         | 0.0         | 0.0         | 0.0         | 0.0         | 0.0         | 0.0         | 0.0         | 0.0         | 0.0         | 0.0         | 0.0         | 0.0         | 0.0         |
|                | Clostridia          |                    |             |             |             |             |             |             |             |             |             |             |             |             |             |             |
|                |                     | Clostridiales      | 1.5         | <b>92.6</b> | <b>98.1</b> | <b>56.9</b> | <b>83.8</b> | <b>86.2</b> | 0.8         | <b>89.3</b> | <b>78.8</b> | <b>29.3</b> | <b>59.5</b> | <b>94.8</b> | <b>76.9</b> | <b>80.2</b> |
|                |                     | Natranaerobiales   | 0.0         | 0.0         | 0.0         | 0.0         | 0.0         | 0.0         | 0.0         | 0.0         | 0.0         | 0.0         | 0.0         | 0.7         | 0.0         | 0.0         |
| Proteobacteria |                     |                    |             |             |             |             |             |             |             |             |             |             |             |             |             |             |
|                | Alphaproteobacteria |                    |             |             |             |             |             |             |             |             |             |             |             |             |             |             |
|                |                     | Caulobacteriales   | 1.2         | 0.0         | 0.0         | 3.5         | 0.5         | 0.9         | 3.1         | 0.1         | 0.2         | 0.5         | 0.0         | 0.0         | 0.0         | 0.2         |
|                |                     | Rhizobiales        | 4.1         | 0.0         | 0.1         | 9.5         | 0.3         | 0.6         | 4.6         | 0.9         | 0.2         | 1.3         | 0.0         | 0.0         | 0.0         | 0.2         |
|                |                     | Rhodobacteriales   | 0.0         | 0.0         | 0.0         | 0.0         | 0.0         | 0.0         | 0.1         | 0.0         | 0.0         | 0.0         | 0.0         | 0.0         | 0.0         | 0.0         |
|                |                     | Rhodospirillales   | 0.2         | 0.0         | 0.1         | 1.7         | 0.1         | 0.2         | <b>11.4</b> | 1.9         | 0.5         | 0.4         | 0.0         | 0.2         | 0.0         | 0.4         |
|                |                     | Rickettsiales      | 0.1         | 0.0         | 0.0         | 0.0         | 0.0         | 0.0         | 0.0         | 0.0         | 0.0         | 0.1         | 0.0         | 0.0         | 0.0         | 0.0         |
|                | Betaproteobacteria  |                    |             |             |             |             |             |             |             |             |             |             |             |             |             |             |
|                |                     | Burkholderiales    | <b>23.3</b> | 0.0         | 0.5         | 6.5         | 1.4         | 0.7         | 2.2         | 1.6         | 3.7         | 1.5         | 0.0         | 0.7         | 0.7         | 0.1         |
|                |                     | Neisseriales       | 0.0         | 0.0         | 0.5         | 0.2         | 0.5         | 0.0         | 0.2         | 0.4         | 0.0         | 0.0         | 0.0         | 0.0         | 0.0         | 0.0         |
|                |                     | Nitrosomonadales   | 0.0         | 0.0         | 0.0         | 0.0         | 0.0         | 0.0         | 0.0         | 0.0         | 0.0         | 0.0         | 1.0         | 0.0         | 0.0         | 0.0         |
|                |                     | Rhodocyclales      | 0.0         | 1.3         | 0.0         | 0.0         | 0.0         | 0.3         | 0.0         | 0.0         | 0.0         | 0.0         | 0.0         | 0.0         | 0.0         | 0.0         |
|                | Deltaproteobacteria |                    |             |             |             |             |             |             |             |             |             |             |             |             |             |             |
|                |                     | Desulfuromonadales | 0.0         | 0.5         | 0.0         | <b>5.7</b>  | 0.0         | 0.0         | 0.0         | 0.0         | 0.0         | 0.0         | 0.0         | 0.1         | 0.5         | 0.3         |
|                |                     | Myxococcales       | 0.1         | 0.0         | 0.0         | 0.1         | 0.0         | 0.0         | 0.1         | 0.0         | 0.1         | 0.7         | 0.0         | 0.0         | 0.0         | 0.1         |
|                | Gammaproteobacteria |                    |             |             |             |             |             |             |             |             |             |             |             |             |             |             |
|                |                     | Enterobacteriales  | 0.7         | 0.1         | 0.2         | 0.4         | <b>10.0</b> | 0.0         | <b>63.7</b> | 3.1         | 0.0         | 0.0         | 0.1         | 0.0         | 0.0         | 0.0         |
|                |                     | Pseudomonadales    | 0.2         | 0.1         | 0.0         | 1.1         | 2.4         | 0.1         | 6.1         | 0.6         | 0.1         | 0.1         | 0.0         | 0.0         | 0.0         | 0.1         |
|                |                     | Xanthomonadales    | 0.2         | 0.0         | 0.0         | 1.2         | 0.0         | 0.0         | 0.2         | 0.1         | 0.2         | 0.2         | 0.0         | 0.0         | 0.0         | 0.1         |
