# Supplementary material
Source: publisher figshare collection journal article supplement (https://tandf.figshare.com/articles/dataset/_/5743326)

**Supplemental Figure S1.** Boxplot showing impact of culturing on microbial community diversity (based on calculate Simpson alpha diversity index).

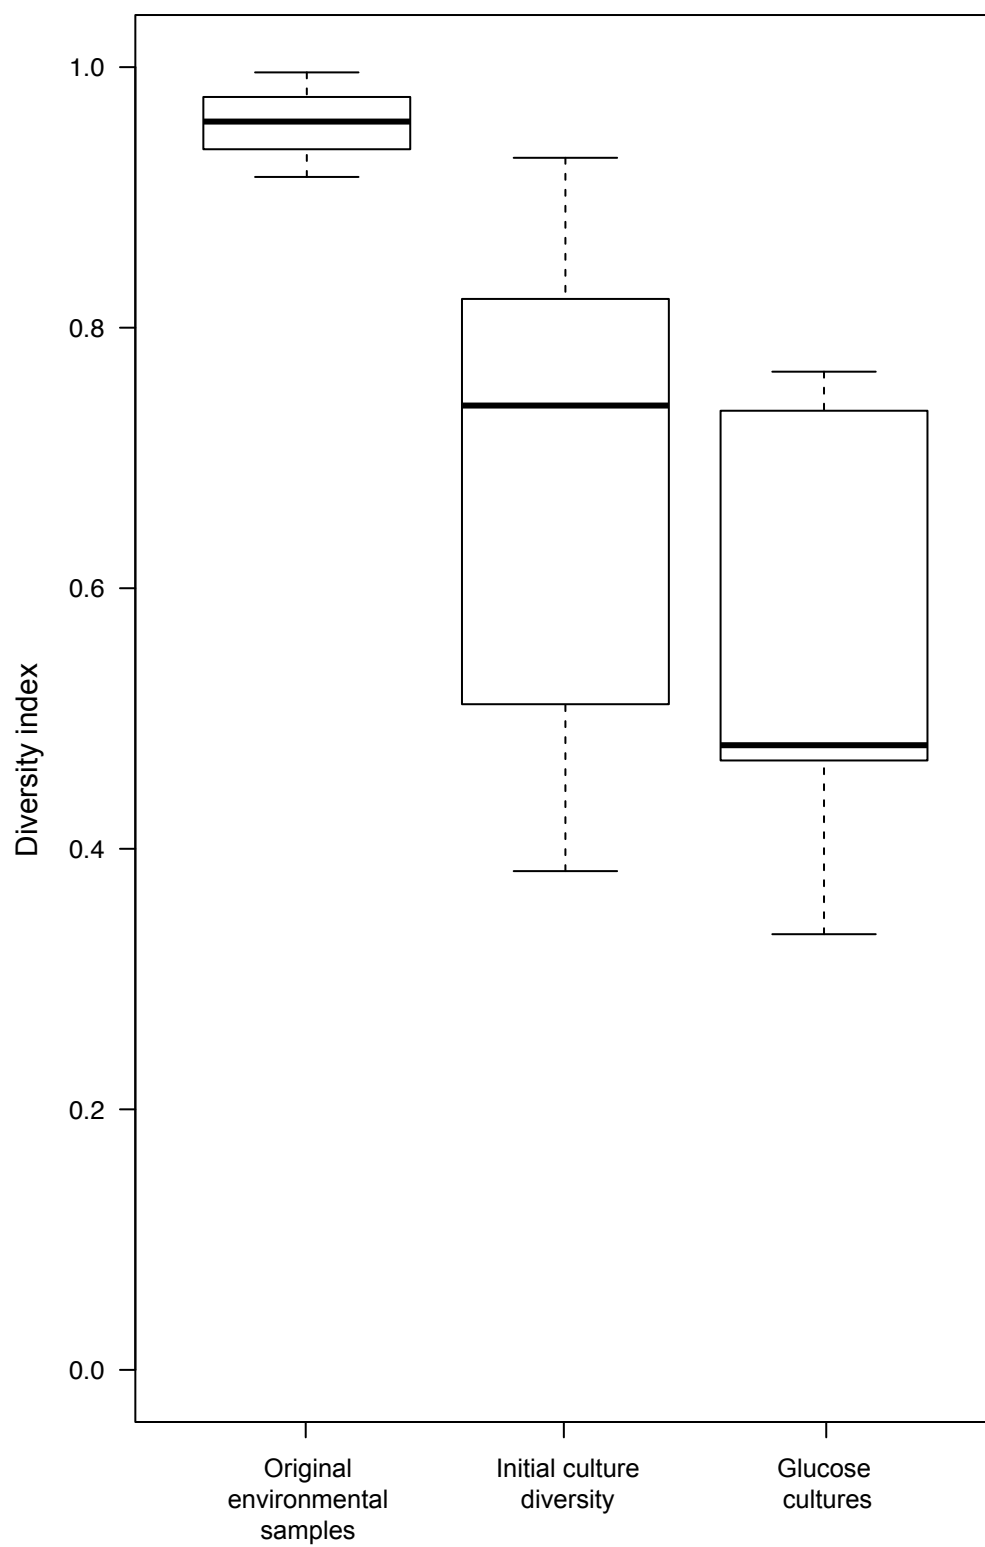

Supplement: Supplementary file 4 [file 1]
