# Supplementary material
Source: publisher figshare collection journal article supplement (https://tandf.figshare.com/articles/dataset/_/5743326)
Supplement: Supplementary file 5 [file 1]

Archive with 6 entries (6 files):
- Suppfig1.pdf
- Supplemental Figure S2.pdf
- Supplemental Table T1 (new).docx
- Supplemental Table T2 (new).pdf
- Supplemental Table T3 (new).pdf
- Supplemental Table T4 (New).pdf
