# Supplementary material
Source: publisher figshare collection journal article supplement (https://tandf.figshare.com/articles/dataset/_/5743326)
Supplement: Supplementary file 5 [file 1 › Supplemental Table T1 (new).docx]

**Supplemental Table T1. Comparative Akaike information criterion results for the five hypotheses testing correlation between culture conditions and observed levels of Fe(III) reduction.**

| **Model Hypotheses** | ***df*** | **AIC Value** |
| --- | --- | --- |
| ***H1***: Fe(II)-production is proportional to the pH/Fe(III)/carbon sources | 5 | 14.467 |
| ***H2***: Fe(II)-production is proportional to the pH/Fe(III)/carbon/sample site | 7 | 18.478 |
| ***H3***: Fe(II)-production is proportional to the pH/sample site and interaction between Fe(III)/carbon | 7 | 18.474 |
| ***H0***: all values are evenly distributed around the mean | 1 | 6.417 |
| ***H0S***: all values are evenly distributed around the mean for each site | 3 | 10.425 |

*df* = degrees of freedom
