# Supplementary material
Source: publisher figshare collection journal article supplement (https://tandf.figshare.com/articles/dataset/_/5743326)
Supplement: Supplementary file 5 [file 1 › Supplemental Table T4 (New).pdf]

**Supplemental Table T4.** Illumina 16S rRNA sequencing data of glucose cultures (described in Table 4) showing the relative contribution (in %) of taxa identified.

|                |                     |                   | Sample site            |       |                 |       |               |  |
|----------------|---------------------|-------------------|------------------------|-------|-----------------|-------|---------------|--|
|                |                     |                   | Bubbling Pool Sediment |       | Surface Biofilm |       | Pool sediment |  |
|                |                     |                   |                        |       |                 |       |               |  |
|                |                     |                   | Fe(III) chemistry      |       |                 |       |               |  |
|                |                     |                   | HFO                    | DSO   | HFO             | DSO   | HFO           |  |
| Phylum         | Class               | Order             |                        |       |                 |       |               |  |
| Actinobacteria | Actinobacteria      | Actinomycetales   | 1.42                   | 0.00  | 0.11            | 0.01  | 0.03          |  |
| Bacteroidetes  | Bacteroidetes       | Bacteroidales     | 0.00                   | 0.00  | 0.00            | 0.01  | 0.00          |  |
| Firmicutes     | Bacilli             | Bacillales        | 0.01                   | 0.01  | 0.00            | 43.82 | 0.72          |  |
|                |                     | Lactobacillales   | 0.00                   | 0.00  | 0.00            | 0.01  | 0.00          |  |
|                | Clostridia          | Clostridiales     | 98.54                  | 4.90  | 88.36           | 56.01 | 99.21         |  |
| Proteobacteria | Betaproteobacteria  | Burkholderiales   | 0.01                   | 0.01  | 0.00            | 0.12  | 0.02          |  |
|                |                     | Neisseriales      | 0.00                   | 0.08  | 0.00            | 0.00  | 0.00          |  |
|                | Gammaproteobacteria | Enterobacteriales | 0.00                   | 94.68 | 11.50           | 0.01  | 0.00          |  |
|                |                     | Pasteurellales    | 0.00                   | 0.00  | 0.00            | 0.01  | 0.00          |  |
|                |                     | Pseudomonadales   | 0.00                   | 0.31  | 0.00            | 0.00  | 0.00          |  |
| Unassigned     |                     |                   | 0.00                   | 0.00  | 0.01            | 0.00  | 0.00          |  |
