# Supplementary material
Source: publisher figshare collection journal article supplement (https://tandf.figshare.com/articles/dataset/_/5743326)

**Supplemental Figure S2.** Growth curve used to Fe(II) production rates

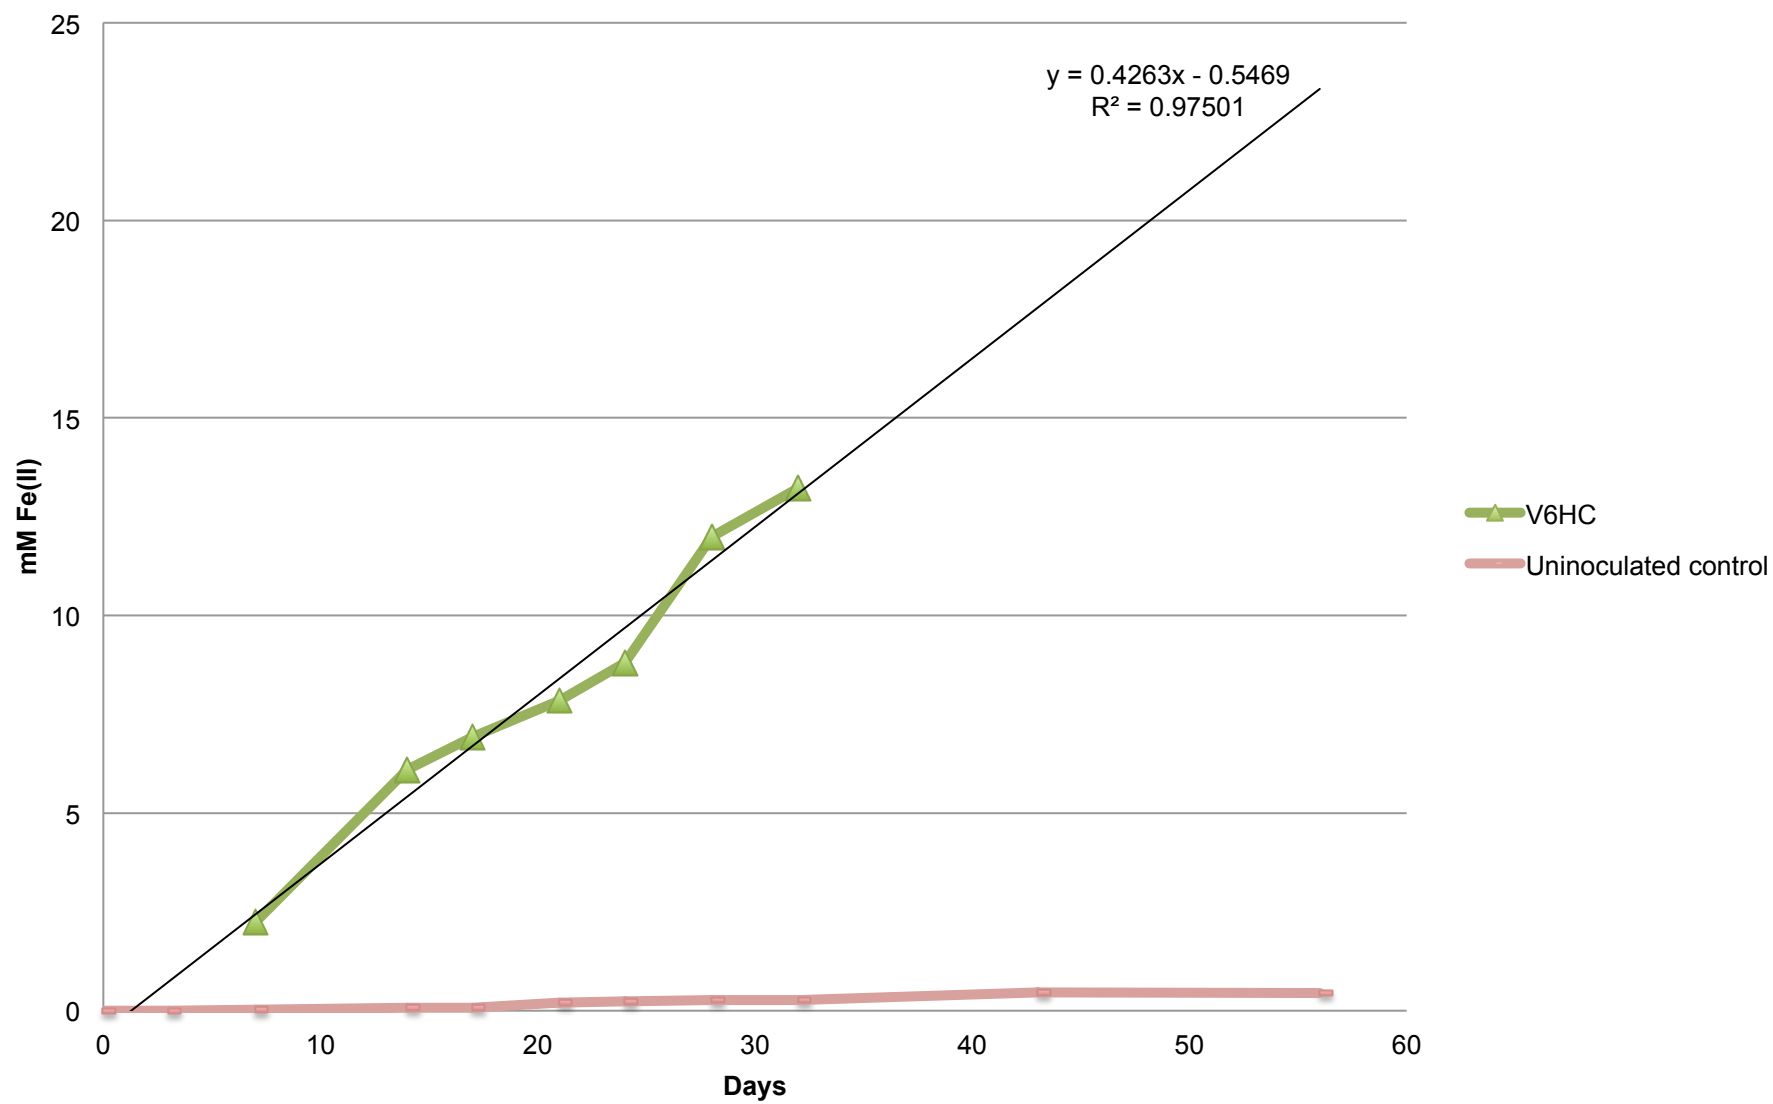

Supplement: Supplementary file 1 [file 1]
